# Supplementary material
Source: PubMed Central journal article supplement (PMC2797251)
Supplement: supp_M109.017970_jbc.M109.017970-1.pdf [file supp_M109.017970_jbc.M109.017970-1.pdf]

---

**Supplemental Table 1: Primer Sequences for Real-Time Quantitative PCR**

---

|               |                                                                                                   |
|---------------|---------------------------------------------------------------------------------------------------|
| mGAPDH        | F 5' AGG TCG GTG TGA ACG GAT TTG 3'<br>R 5' TGT AGA CCA TGT AGT TGA GGT CA 3'                     |
| mGADD153/CHOP | F 5' CTG GAA GCC TGG TAT GAG GAT 3'<br>R 5' CAG GGT CAA GAG TAG TGA AGG T 3'                      |
| mXBP-1(s)     | F 5' GAG TCC GCA GCA GGT G 3'<br>R 5' GTG TCA GAG TCC ATG GGA 3'                                  |
| mGRP78/BiP    | F 5' CGA GGA GGA GGA CAA GAA GG 3'<br>R 5' CAC CTT GAA CGG GCA AGA ACT 3'                         |
| mSCD-1        | F 5' TGG GTT GGC TGC TTG TG 3'<br>R 5' GCG TGG GCA GGA TGA AG 3'                                  |
| mHMG-CoAR     | F 5' CCT GTG GAA TGC CTT GTG ATT 3'<br>R 5' AGC CGA AGC AGC ACA TGA T 3'                          |
| mSREBP-2      | F 5' GCA GCA ACG GGA CCA TTC T 3'<br>R 5' CCC CAT GAC TAA GTC CTT CAA CT 3'                       |
| mSREBP-1c     | F 5' ATC GGC GCG GAA GCT GTC GGG GTA GCG TC 3'<br>R 5' ACT GTC TTG GTT GTT GAT GAG CTG GAG CAT 3' |
| mSR-B1        | F 5' TTT GGA GTG GTA GTA AAA AGG GC 3'<br>R 5' TGA CAT CAG GGA CTC AGA GTA G 3'                   |
| hACTIN        | F 5' TCT ACA ATG AGC TGC GTG TG 3'<br>R 5' GGT GAG GAT CTT CAT GAG GT 3'                          |
| hGADD153/CHOP | F 5' GCA CCT CCC AGA GCC CTC ACT CTC C 3'<br>R 5' GTC TAC TCC AAG CCT TCC CCC TGC G 3'            |
| hXBP-1(s)     | F 5' CCG CAG CAG GTG CAG G 3'<br>R 5' GAG TCA ATA CCG CCA GAA TCC A 3'                            |
| hGRP78/BiP    | F 5' GGC CAA ATT TGA AGA GCT GA 3'<br>R 5' GCT CCT TGC CAT TGA AGA AC 3'                          |

---
