# Supplementary material
Source: PubMed Central journal article supplement (PMC2797251)
Supplement: supp_M109.017970_jbc.M109.017970-2.pdf [file supp_M109.017970_jbc.M109.017970-2.pdf]

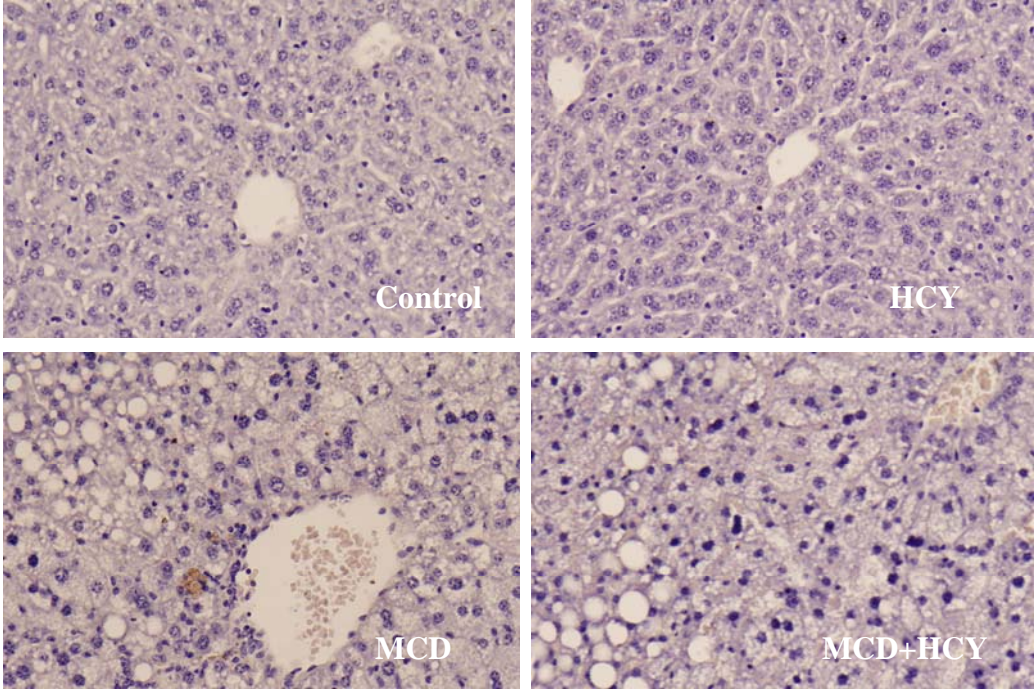

**Supplemental Figure 1:** TUNEL assay of liver tissue from mice fed control, homocysteine (HCY), MCD, or MCD+HCY diets for 14 days.
