# Supplementary material
Source: PubMed Central journal article supplement (PMC2797251)
Supplement: supp_M109.017970_jbc.M109.017970-3.pdf [file supp_M109.017970_jbc.M109.017970-3.pdf]

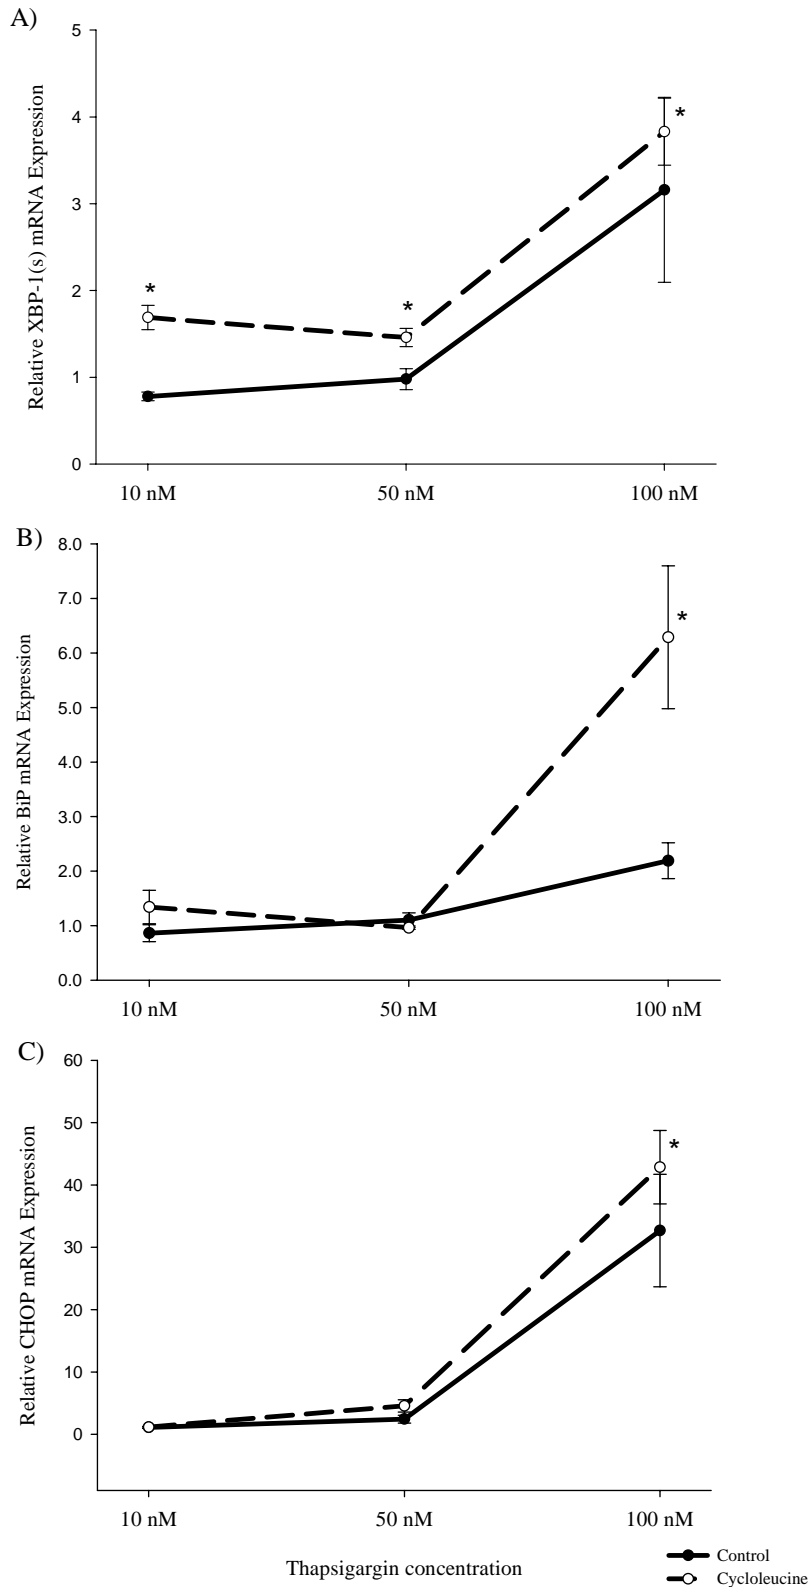

Supplemental Figure 2: Effect of 10nM, 50nM, or 100nM thapsigargin for 6 hrs on relative expression of A) XBP-1(s), B) BiP, and C) CHOP in control or cycloleucine-treated HepG2 cells. Expression is relative to non-thapsigargin-treated cells. Error bars are  $\pm$  SEM. \* $p < 0.05$
