# Supplementary material
Source: PubMed Central journal article supplement (PMC2797251)
Supplement: supp_M109.017970_jbc.M109.017970-4.pdf [file supp_M109.017970_jbc.M109.017970-4.pdf]

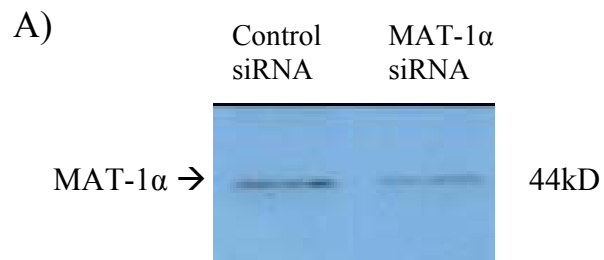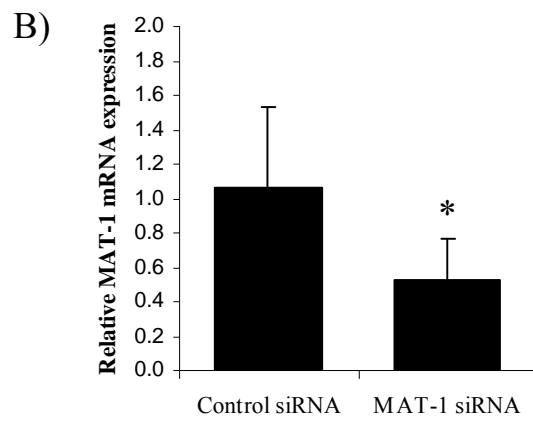

**Supplemental Figure 3:** Expression of MAT-1 $\alpha$  in HepG2 cells treated with control or MAT-1 $\alpha$  siRNA. A) Protein expression by Western blot, pooled samples, n=3, B) mRNA expression by quantitative PCR, mean n=6  $\pm$  SD. \* p<0.05
